# Supplementary material for: ASCT2 is the primary serine transporter in cancer cells
Source: PubMed Central journal article supplement — bioRxiv. 2023 Oct 11:2023.10.09.561530. Preprint. [Version 1] doi: 10.1101/2023.10.09.561530 (PMC10592681; doi:10.1101/2023.10.09.561530), 2023-10-11
Supplement: NIHPP2023.10.09.561530v1-supplement-3.pdf [file NIHPP2023.10.09.561530v1-supplement-3.pdf]

## Figure S1

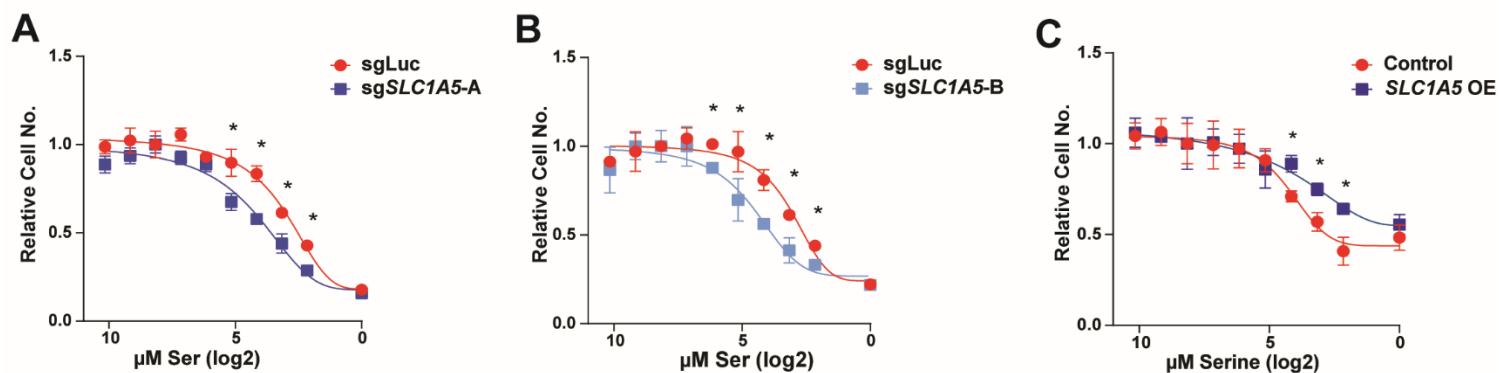

### Figure S1: Identification of ASCT2 as a serine transporter in luminal breast cancer cells

A-B) Serine dose curves with MCF7 control (sgLuc) and ASCT2 KO (sgSLC1A5) cells. Values are the means  $\pm$ SD of triplicate samples from a representative experiment of 3 independent experiments. \*p < 0.05 by Welch's t-test. Cell numbers normalized to each group's count at normal RPMI serine dose.

C). Serine dose growth curve with MCF7 control and ASCT2 over-expressing (SLC1A5 OE) cells. Values are the means  $\pm$ SD of triplicate samples from an experiment representative of 3 independent experiments. \*p < 0.05 by Welch's t-test comparing individual serine doses. Cell numbers normalized to each group's count at normal RPMI serine dose.

## Figure S2

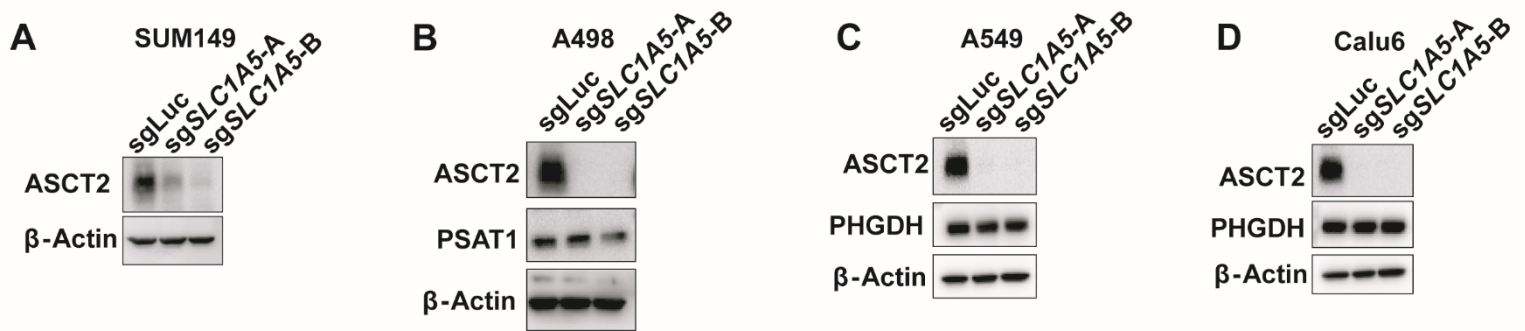

**Figure S2. ASCT2 contributes to serine uptake in non-auxotrophic cells**

A-D). Representative western blot from SUM149 (A), A498 (B), A549 (C), and Calu6 (D) control (sgLuc) and ASCT2 KO (sgSLC1A5) cells.

## Figure S3

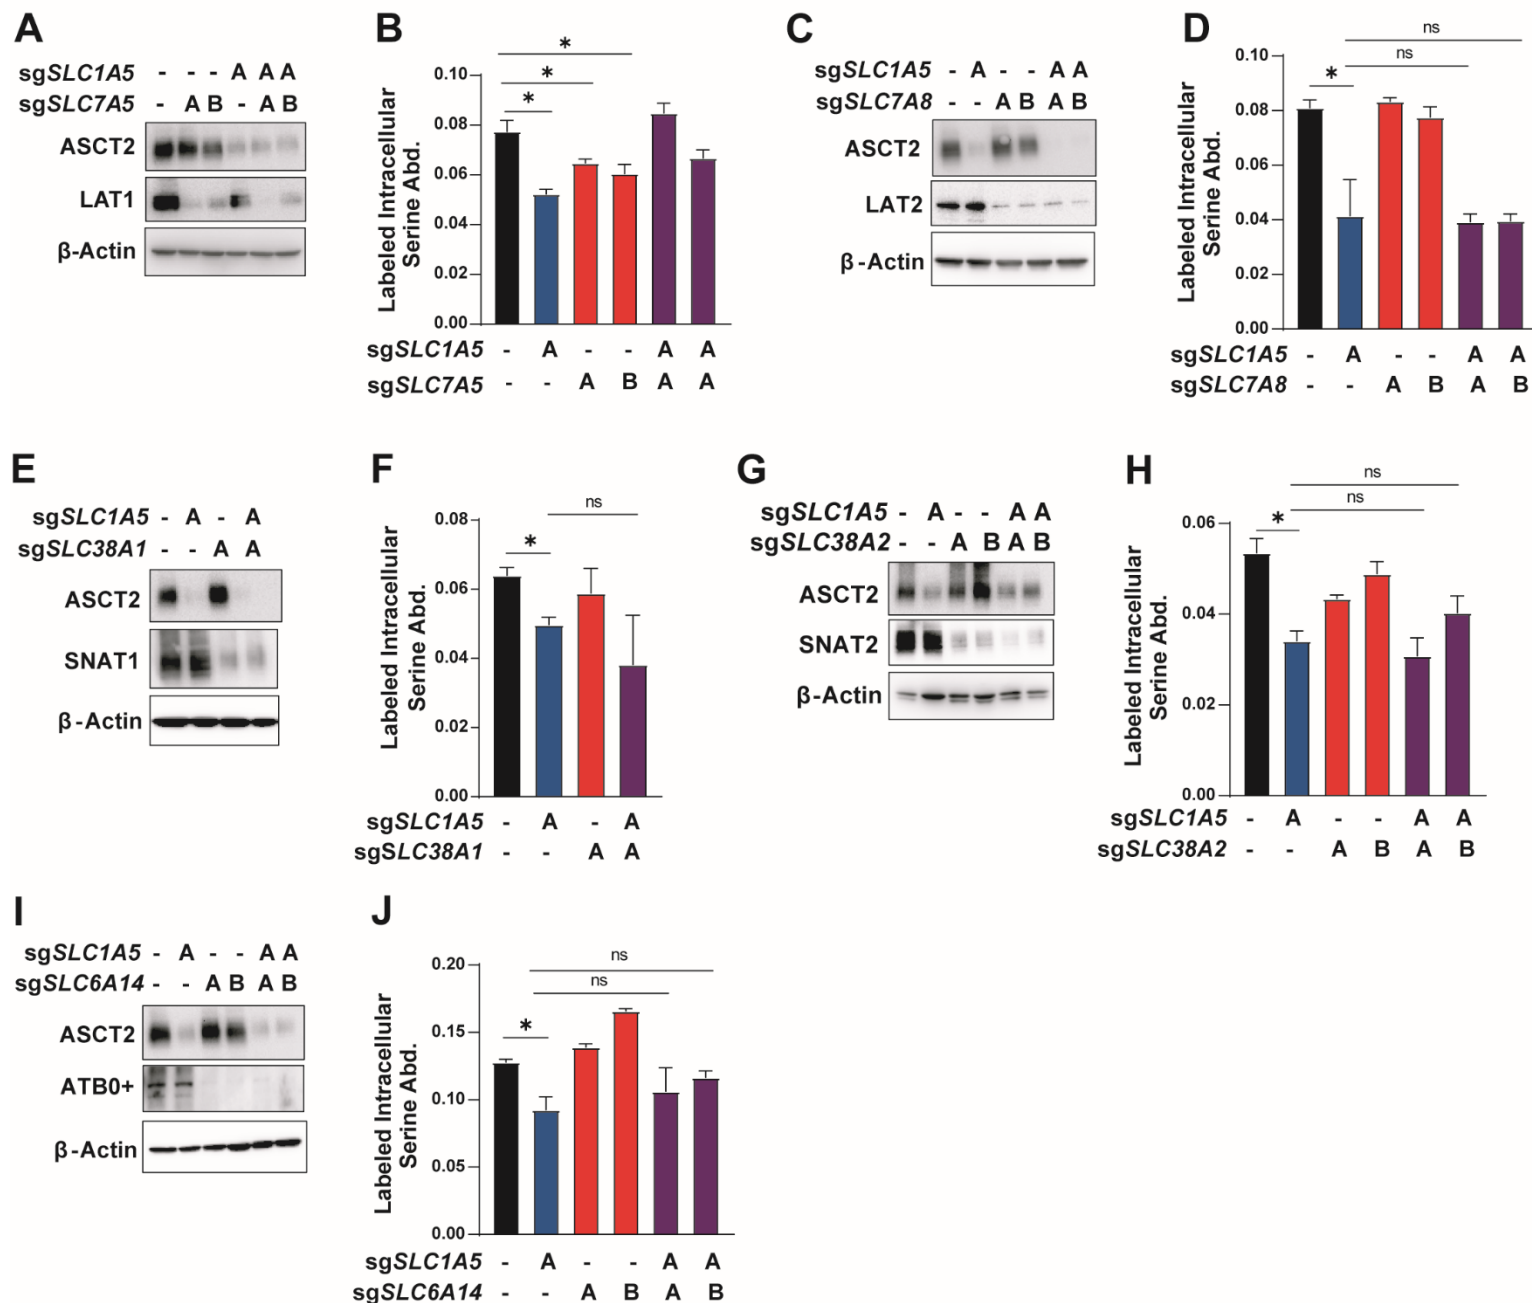

**Figure S3. Transporter compensation in the absence of ASCT2**

- A). Western blot from single and double LAT1 (sgSLC7A5) and ASCT2 (sgSLC1A5) KO MCF7 cells.
- B). Acute serine uptake for single and double LAT1 (sgSLC7A5) and ASCT2 (sgSLC1A5) KO MCF7 cells. Values are the mean  $\pm$ SD of triplicate samples from an experiment representative of 2 independent experiments. \* $p < 0.05$  by Welch's t-test.
- C). Western blot from single and double LAT2 (sgSLC7A8) and ASCT2 (sgSLC1A5) KO MCF7 cells.
- D). Acute serine uptake for single and double LAT2 (sgSLC7A8) and ASCT2 (sgSLC1A5) KO MCF7 cells. Values are the mean  $\pm$ SD of triplicate samples from an experiment representative of 2 independent experiments. \* $p < 0.05$  by Welch's t-test.
- E). Western blot from single and double SNAT1 (sgSLC38A1) and ASCT2 (sgSLC1A5) KO MCF7 cells.

F). Acute serine uptake for single and double SNAT1 (*sgSLC38A1*) and ASCT2 (*sgSLC1A5*) KO MCF7 cells. Values are the mean  $\pm$ SD of triplicate samples from an experiment representative of 3 independent experiments. \* $p < 0.05$  by Welch's t-test.

G). Western blot for single and double SNAT2 (*sgSLC38A2*) and ASCT2 (*sgSLC1A5*) KO MCF7 cells.

H). Acute serine uptake for single and double SNAT2 (*sgSLC38A2*) and ASCT2 (*sgSLC1A5*) KO MCF7 cells. Values are the mean  $\pm$ SD of triplicate samples from an experiment representative of 3 independent experiments. \* $p < 0.05$  by Welch's t-test.

I). Western blot for single and double ATB0+ (*sgSLC6A14*) and ASCT2 (*sgSLC1A5*) KO MCF7 cells.

J). Acute serine uptake for single and double ATB0+ (*sgSLC6A14*) and ASCT2 (*sgSLC1A5*) KO MCF7 cells. Values are the mean  $\pm$ SD of triplicate samples from an experiment representative of 3 independent experiments. \* $p < 0.05$  by Welch's t-test.

## Figure S4

A

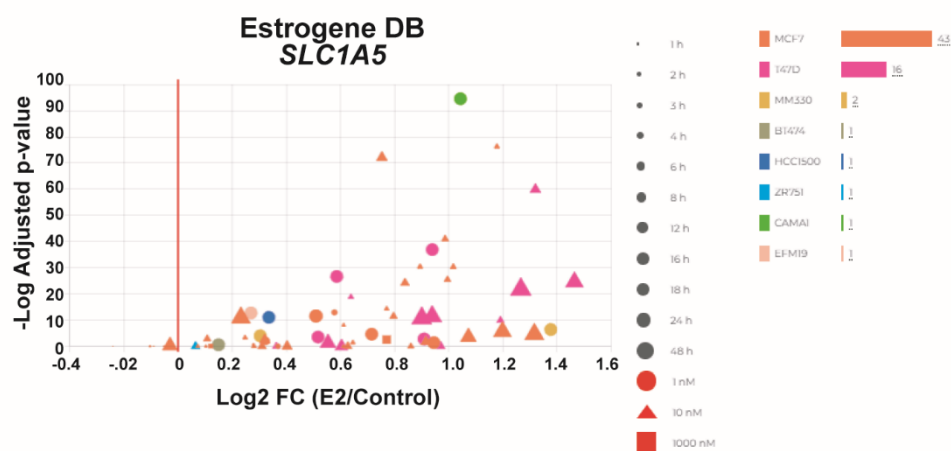

B

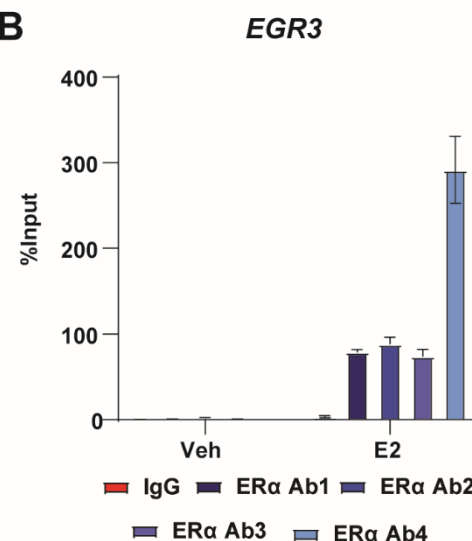

**Figure S4. ER $\alpha$  promotes serine uptake via direct regulation of *SLC1A5***

A). RNA-Seq Analysis of *SLC1A5* expression after stimulation with different doses of estradiol in breast cancer cell lines from Estrogene DB ([www.estrogene.org](http://www.estrogene.org)).

B). ChIP-qPCR results from MCF7 cells treated with vehicle or 10 nM estradiol for 30 minutes. Four unique antibodies against ER $\alpha$  were used along with an IgG control antibody. Values are the means  $\pm$ SD of triplicate samples from two independent qPCR experiments. *EGR3* is a known transcriptional target of ER $\alpha$  and therefore acts as a positive control.
